# Supplementary material for: Does Ipv Boost Intestinal Immunity Among Children Under Five Years of Age? An Experience From Pakistan
Source: Preprints.org preprint supplement (doi:10.20944/preprints202306.1867.v1), 2023-06-27
Supplement: Supplementary file 3 [file supplementary]

Appendix Table 1: Serum Samples collected at baseline, V1 and V2, Overall and site wise

|  | **Baseline** | **Visit 1 (V1)** | **Visit 2 (V2)** |
| --- | --- | --- | --- |
| Overall | 5972 | 4895 | 4552 |
| Karachi | 1788 | 1565 | 1132 |
| Bajaur | 2001 | 1542 | 1349 |
| Kashmore | 2183 | 1806 | 1423 |

Appendix Table 2: Stool Samples collected at Day 0, Day 7 and Day 21, overall and site wise

|  | **Day 0** | **Day 7** | **Day 21** |
| --- | --- | --- | --- |
| Overall | 4210 | 4084 | 4185 |
| Karachi | 1324 | 1143 | 1219 |
| Bajaur | 1371 | 1134 | 1191 |
| Kashmore | 1515 | 1807 | 1748 |
